# Supplementary material
Source: Springer Nature journal article supplement (https://www.springermedizin.de/resource/supplementary/12943_2014_1378_MOESM9_ESM.pdf/9552830)

**A**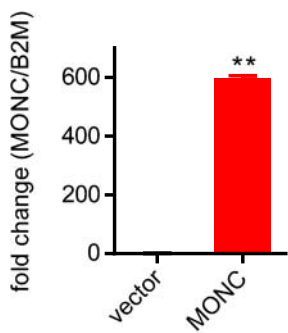**B**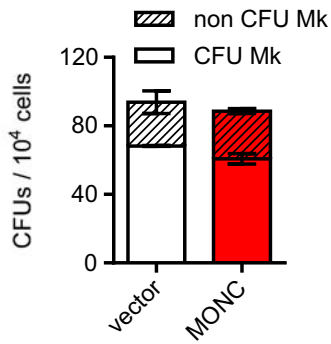**C**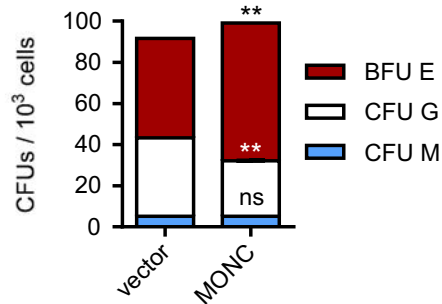**D**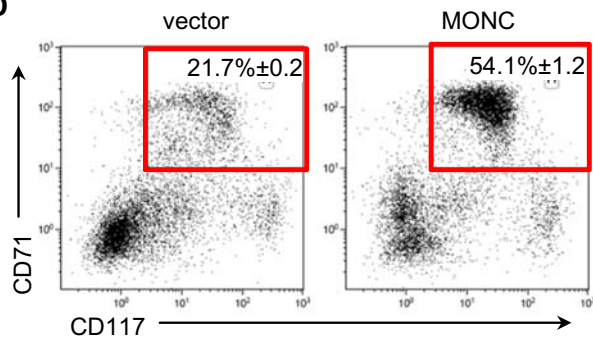**E**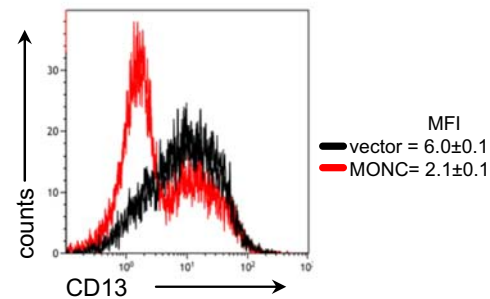**F**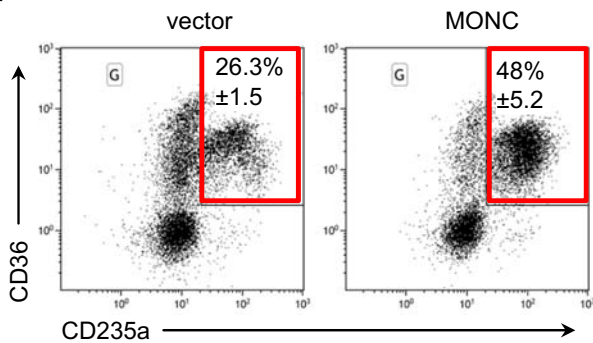**G**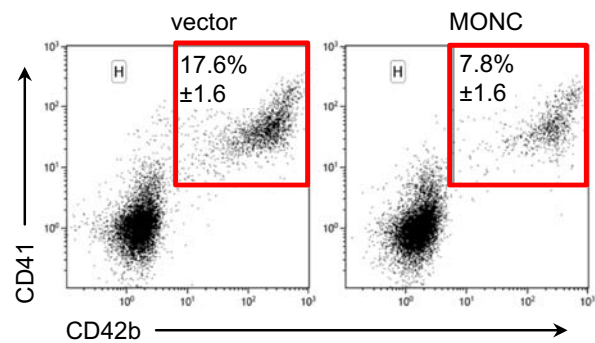

Supplement: MOESM9 [file 9552830]
